# Supplementary material for: Phylogenetic analysis of higher-level relationships within Hydroidolina (Cnidaria: Hydrozoa) using mitochondrial genome data and insight into their mitochondrial transcription
Source: PubMed Central journal article supplement (PMC4655093; doi:10.7717/peerj.1403), 2015-11-19
Supplement: peerj-03-1403-s011.pdf [file peerj-03-1403-s011.pdf]

| Species                             | Primer left | Primer right | PCR size |
|-------------------------------------|-------------|--------------|----------|
| <i>Boreohydra simplex</i>           | HYDR-rnl-R1 | cox1-r       | >12 kb   |
| <i>Catablema vesicarium</i>         | HYDR-rnl-R1 | cox1-r       | >13 kb   |
| <i>Eudendrium capillare</i>         | rnl-r       | nad5-f       | 6 kb     |
|                                     | nad5-f      | cox1-r       | >7 kb    |
| <i>Euphysa aurata</i>               | HYDR-rnl-F1 | cox1-r       | >12 kb   |
| <i>Geryonia proboscidalis</i>       | cox1-r      | cob-r        | >11 kb   |
| <i>Halitholus cirratus</i>          | HYDR-rnl-R1 | cox1-r       | >13 kb   |
| <i>Leuckartiara octona</i>          | HYDR-rnl-R1 | cox1-r       | >13 kb   |
| <i>Melicertum octocostatum</i>      | HYDR-rnl-R1 | cox1-r       | >13 kb   |
| <i>Mitrocomella polydiademata</i>   | HYDR-rnl-R1 | cox1-r       | >13 kb   |
| <i>Plotonide borealis</i>           | HYDR-rnl-F1 | cox1-r       | >12 kb   |
| <i>Proboscidactyla flavicirrata</i> | nad5-f      | cob-r        | 6 kb     |
| <i>Ptychogena lactea</i>            | HYDR-rnl-R1 | cox1-r       | >13 kb   |
| <i>Rathkea octopunctata</i>         | HYDR-rnl-R1 | cox1-r       | >13 kb   |
| <i>Rhizophysa eysenhardti</i>       | cox1-r      | cox1-r       | >13 kb   |
| <i>Sarsia tubulosa</i>              | HYDR-rnl-R1 | cox1-r       | >13 kb   |
| <i>Tiaropsis multicirrata</i>       | HYDR-rnl-R1 | cox1-r       | >13 kb   |
