# Supplementary material for: Phylogenetic analysis of higher-level relationships within Hydroidolina (Cnidaria: Hydrozoa) using mitochondrial genome data and insight into their mitochondrial transcription
Source: PubMed Central journal article supplement (PMC4655093; doi:10.7717/peerj.1403), 2015-11-19
Supplement: peerj-03-1403-s012.pdf [file peerj-03-1403-s012.pdf]

| Alignments |           | 4 OTUs | 8 OTUs | 16 OTUs      | 32 OTUs      |
|------------|-----------|--------|--------|--------------|--------------|
| NT         | Iss       | 0.588  | 0.589  | 0.618        | 0.649        |
|            | Iss.cSym  | 0.857  | 0.845  | 0.848        | 0.817        |
|            | P         | 0.000  | 0.000  | 0.000        | 0.000        |
|            | Iss.cAsym | 0.846  | 0.763  | 0.677        | <b>0.571</b> |
|            | P         | 0.000  | 0.000  | 0.000        | <b>0.000</b> |
| rRNA       | Iss       | 0.680  | 0.704  | 0.750        | 0.832        |
|            | Iss.cSym  | 0.842  | 0.825  | 0.809        | 0.793        |
|            | P         | 0.000  | 0.000  | 0.005        | 0.112        |
|            | Iss.cAsym | 0.818  | 0.732  | <b>0.637</b> | <b>0.524</b> |
|            | P         | 0.000  | 0.107  | <b>0.000</b> | <b>0.000</b> |
| allnt      | Iss       | 0.597  | 0.598  | 0.647        | 0.695        |
|            | Iss.cSym  | 0.858  | 0.844  | 0.851        | 0.818        |
|            | P         | 0.000  | 0.000  | 0.000        | 0.000        |
|            | Iss.cAsym | 0.847  | 0.761  | 0.675        | <b>0.572</b> |
|            | P         | 0.000  | 0.000  | 0.000        | <b>0.000</b> |
