# Supplementary material for: Phylogenetic analysis of higher-level relationships within Hydroidolina (Cnidaria: Hydrozoa) using mitochondrial genome data and insight into their mitochondrial transcription
Source: PubMed Central journal article supplement (PMC4655093; doi:10.7717/peerj.1403), 2015-11-19
Supplement: peerj-03-1403-s013.pdf [file peerj-03-1403-s013.pdf]

| Name  | Size  | Ambiguities | Informative sites |              | Percentage |              |
|-------|-------|-------------|-------------------|--------------|------------|--------------|
|       |       |             | with gaps         | without gaps | with gaps  | without gaps |
| AA    | 2902  | 0           | 2501              | 1851         | 14         | 36           |
| NT    | 9864  | 205         | 8850              | 7074         | 10         | 28           |
| rRNA  | 2154  | 17          | 1664              | 1426         | 23         | 34           |
| allNT | 12018 | 222         | 10773             | 8500         | 10         | 29           |
