# Supplementary material for: Phylogenetic analysis of higher-level relationships within Hydroidolina (Cnidaria: Hydrozoa) using mitochondrial genome data and insight into their mitochondrial transcription
Source: PubMed Central journal article supplement (PMC4655093; doi:10.7717/peerj.1403), 2015-11-19
Supplement: peerj-03-1403-s014.pdf [file peerj-03-1403-s014.pdf]

| Name           | Sequence                                              |
|----------------|-------------------------------------------------------|
| UniAdp_barco1  | ACACTCTTTCCTACACGACGCTCTCCGATCTCAGG*T*T/3Phos/        |
| UniAdp_barco2  | ACACTCTTTCCTACACGACGCTCTCCGATCTGCTA*T*T/3Phos/        |
| UniComp_barco1 | AACCTGAGATCGGAAGAGC                                   |
| UniComp_barco2 | AATAGCAGATCGGAAGAGC                                   |
| IndAdp_short   | GTGACTGGAGTTCAGACGTGTGCTCTTCCGAT*C*T/3Phos/           |
| IndCompAdp     | AGATCGGAAGAGCA                                        |
| UniAdp_long    | AATGATACGGCGACCACCGAGATCTACACTCTTTCCTACACGACGC        |
| UniPrim1_PCR   | ACACTCTTTCCTACACGACGC                                 |
| UniPrim2_PCR   | AATGATACGGCGACCACCGAGATC                              |
| IndPrim1_PCR   | GTGACTGGAGTTCAGACGTG                                  |
| IndPrim2_PCR   | CAAGCAGAAGACGGCATAACGAG                               |
| IndAdp_long1   | CAAGCAGAAGACGGCATAACGAGATTCGCAGGGTGACTGGAGTTCAGACGTG  |
| IndAdp_long2   | CAAGCAGAAGACGGCATAACGAGATCTCTGCAGTGACTGGAGTTCAGACGTG  |
| IndAdp_long3   | CAAGCAGAAGACGGCATAACGAGATCCCTAGGTGTGACTGGAGTTCAGACGTG |
| IndAdp_long4   | CAAGCAGAAGACGGCATAACGAGATGGATCAAGTGACTGGAGTTCAGACGTG  |
| IndAdp_long5   | CAAGCAGAAGACGGCATAACGAGATGCAAGATGTGACTGGAGTTCAGACGTG  |
| IndAdp_long6   | CAAGCAGAAGACGGCATAACGAGATATGGAGAGTGACTGGAGTTCAGACGTG  |
| IndAdp_long7   | CAAGCAGAAGACGGCATAACGAGATCTCGATGGTGACTGGAGTTCAGACGTG  |
| IndAdp_long8   | CAAGCAGAAGACGGCATAACGAGATGCTCGAAGTGACTGGAGTTCAGACGTG  |
| IndAdp_long9   | CAAGCAGAAGACGGCATAACGAGATACCAACTGTGACTGGAGTTCAGACGTG  |
| IndAdp_long10  | CAAGCAGAAGACGGCATAACGAGATCCGGTACGTGACTGGAGTTCAGACGTG  |
| IndAdp_long11  | CAAGCAGAAGACGGCATAACGAGATAACTCCGGTGACTGGAGTTCAGACGTG  |
| IndAdp_long12  | CAAGCAGAAGACGGCATAACGAGATTTGAAGTGTGACTGGAGTTCAGACGTG  |
| IndAdp_long13  | CAAGCAGAAGACGGCATAACGAGATACTATCAGTGACTGGAGTTCAGACGTG  |
| IndAdp_long14  | CAAGCAGAAGACGGCATAACGAGATTTGGATCGTGACTGGAGTTCAGACGTG  |
| IndAdp_long15  | CAAGCAGAAGACGGCATAACGAGATCGACCTGGTGACTGGAGTTCAGACGTG  |
| IndAdp_long16  | CAAGCAGAAGACGGCATAACGAGATTAATGCGGTGACTGGAGTTCAGACGTG  |
| IndAdp_long17  | CAAGCAGAAGACGGCATAACGAGATAGGTACCGTGACTGGAGTTCAGACGTG  |
| IndAdp_long18  | CAAGCAGAAGACGGCATAACGAGATTGCGTCCGTGACTGGAGTTCAGACGTG  |
| IndAdp_long19  | CAAGCAGAAGACGGCATAACGAGATGAATCTCGTGACTGGAGTTCAGACGTG  |
| IndAdp_long20  | CAAGCAGAAGACGGCATAACGAGATCATGCTCGTGACTGGAGTTCAGACGTG  |
