# Supplementary material for: Phylogenetic analysis of higher-level relationships within Hydroidolina (Cnidaria: Hydrozoa) using mitochondrial genome data and insight into their mitochondrial transcription
Source: PubMed Central journal article supplement (PMC4655093; doi:10.7717/peerj.1403), 2015-11-19
Supplement: peerj-03-1403-s015.pdf [file peerj-03-1403-s015.pdf]

| Null Hypothesis            | Topological Constraint                                                                                                                        | AU Test p-value |           |           |       |
|----------------------------|-----------------------------------------------------------------------------------------------------------------------------------------------|-----------------|-----------|-----------|-------|
|                            |                                                                                                                                               | AA              | NT        | aIINT     | rRNA  |
| Aplanulata 1st             | (Outgroup (Trachylina (Aplanulata (Siphonophora, Capitata, Leptothecata, Filifera I, Filifera II, Filifera III, Filifera IV))))               | 0.359           | 3.00E-004 | 2.00E-004 | 0.53  |
| Capitata 1st               | (Outgroup (Trachylina (Capitata (Aplanulata, Siphonophora, Leptothecata, Filifera I, Filifera II, Filifera III, Filifera IV))))               | 0.365           | 0.001     | 2.00E-004 | 0.13  |
| Siphonophora 1st           | (Outgroup (Trachylina (Siphonophora (Aplanulata, Capitata, Leptothecata, Filifera I, Filifera II, Filifera III, Filifera IV))))               | 0.687           | 1         | 1         | 0.617 |
| Monophyly of Filifera      | (Outgroup (Trachylina (Siphonophora, Aplanulata, Capitata, Leptothecata (Filifera I, Filifera II, Filifera III, Filifera IV))))               | 0.002           | 5.00E-012 | 1.00E-007 | 0.738 |
| Polyphyly of Filifera      | (Outgroup (Trachylina (Siphonophora, Capitata (Aplanulata, Filifera I, Filifera II) (Leptothecata, Filifera III, Filifera IV))))              | 0.998           | 1         | 1         | 0.262 |
| Monophyly of Anthoathecata | (Outgroup (Trachylina (Siphonophora, Leptothecata (Capitata, Aplanulata, Leptothecata, Filifera I, Filifera II, Filifera III, Filifera IV)))) | 0.096           | 0.014     | 0.003     | 0.715 |
| Polyphyly of Anthoathecata | (Outgroup (Trachylina (Siphonophora (Capitata, Aplanulata, Filifera I, Filifera II) (Leptothecata, Filifera III, Filifera IV))))              | 0.904           | 0.986     | 0.997     | 0.285 |
